# Supplementary material for: Small Deletion at the 7q21.2 Locus in a CCM Family Detected by Real-Time Quantitative PCR
Source: Hindawi journal article supplement (doi:10.1155/2010/854737), 2010-01-01
Supplement: f2 [file 854737.f2.pdf]

**Supplementary Table 1.** Primers positions, sequences, and analysis conditions for the 13 microsatellite markers used for haplotype analysis of CCM1 locus.

| Microsatellite | Position | Forward primer            | Reverse primer            | Annealing PCR<br>Temperature (°C) |
|----------------|----------|---------------------------|---------------------------|-----------------------------------|
| D7S660         | 7q       | aggccaactgggg             | gcttgatagtgggaatcattt     | 52                                |
| D7S2410        | 7q       | tatagaagcaaagccaaaagatcct | cggcgccaagacattcag        | 58                                |
| D7S2409        | 7q       | taagt(agct)ctggggatctaag  | tacatatttatggggtaactgatga | 58                                |
| D7S1813        | 7q       | agtgacccagctccac          | ccttctcaggctatatttagtagc  | 52                                |
| D7S1789        | 7q       | gaaaacagtgataggaacctgc    | attcacctgctctctaggg       | 52                                |
| D7S646         | 7q       | ctgtctgcttattctattccc     | gttgagtgtccacctgagatttat  | 58                                |
| D7S657         | 7q       | gtcacagcacagtttttgg       | gtcaagtagagattgagattcc    | 58                                |
| D7S2430        | 7q       | tgcaatgagccatgtcc         | gagtgcagtttaatcccatag     | 58                                |
| D7S527         | 7q       | cattgcaaactcaggagatac     | gcagcatctttagactaccttg    | 52                                |
| D7S821         | 7q       | caaaacccaagtacgtga        | tatgacaggcatctgggagt      | 52                                |
| D7S662         | 7q       | gttgacagacaagcacagac      | agctgtttccattcca          | 54                                |
| D7S1799        | 7q       | atgggtattaggagatggggc     | ttgcataagccaattccat       | 52                                |
| D7S1804        | 7q       | ttcaagtgggtgggttact       | tgggtctagtccagtgggtgt     | 52                                |
