# Supplementary material for: Small Deletion at the 7q21.2 Locus in a CCM Family Detected by Real-Time Quantitative PCR
Source: Hindawi journal article supplement (doi:10.1155/2010/854737), 2010-01-01
Supplement: f3 [file 854737.f3.pdf]

**Supplementary Table 2.** Sequence and position of Primers Used for RT-QPCR analysis.

| Primer                                                                                      | Forward primer               | Reverse primer               | Distance<br>(to p-tel. (bp)) |
|---------------------------------------------------------------------------------------------|------------------------------|------------------------------|------------------------------|
| Set1: Primers used for deletion analysis of <i>KRIT1</i> gene                               |                              |                              |                              |
| KRIT1_CD1                                                                                   | tttagcctcaccagaagtccttca     | cactccagaagggtagaaaataatga   | 91,712,366                   |
| KRIT1_CD2                                                                                   | ttattccgaccttctccttga        | tgagtttctgtctgacctgattca     | 91,702,831                   |
| KRIT1_CD3                                                                                   | tcagtacaagtgaagggtgcagtaaaga | ggaatttcccagcaattctgtaag     | 91,680,620                   |
| KRIT1_CD4                                                                                   | tgcccactgaagaaattcatg        | ttcacggaaaaaaactctgcat       | 91,667,987                   |
| KRIT1_FL1                                                                                   | cctaccaataatgagcatgataatttc  | gggtagagtattgagccatgtgaa     | 91,717,972                   |
| KRIT1_FL2                                                                                   | gatcaatgtataaaaactcccacagact | cattgaggatgcatatgacatttattag | 91,715,967                   |
| KRIT1_FL3                                                                                   | ctgagcaagtgatgcttgagttg      | tccagctgtactgccttcaca        | 91,665,033                   |
| KRIT1_FL4                                                                                   | gcacagtgagaagcaagcaaaa       | ggatgctttgtggattgtcctaa      | 91,662,288                   |
| Set2: Primers used for deletion analysis of up- and down-stream <i>KRIT1</i> flanking genes |                              |                              |                              |
| PFTK1_copyn1                                                                                | ccatttgcatatgacaaatatacacgta | ccaagttcagccaccatca          | 90,176,465                   |
| PFTK1_copyn2                                                                                | tgcaaccagaagctggagaa         | tgtttgatagactttgccataactattg | 90,585,349                   |
| FZD1_copyn                                                                                  | cagttctgcgtcggttcaa          | cctcggaccggttcca             | 90,731,617                   |
| MTERF_copyn                                                                                 | aggcggaagtaaaagcgaacta       | gcctcaccaccttccaat           | 91,347,929                   |
| AKAP9_copyn                                                                                 | ggctggagtgtagtgggcaa         | gatcgcttgagcccaggaa          | 91,460,483                   |
| CYP51A1_copyn                                                                               | tggagagaatctgcctcctttaa      | tcaaagtcataaggcagcaatga      | 91,590,381                   |
| ANKIB1_copyn                                                                                | gaggcctctgtgattggatttt       | aacaccacaggctgcatcaa         | 91,855,450                   |
| GATAD1_copyn                                                                                | tgctcggctcagaaacactaaa       | tttctcttggtggagactttctt      | 91,916,028                   |
| ERVWE1_copyn                                                                                | ccctccatgccgtgtat            | gggacgctgcattctccata         | 91,937,536                   |
| PEX1_copyn                                                                                  | gcacacacaaaaacccaatca        | gcctcagcctcccagtag           | 91,974,653                   |
| CDK6                                                                                        | gccacctaacttaacctcttgtttt    | ggtttctctgtctgttcgtgacact    | 92,242,090                   |

*Note:* Table lists primer sequences and absolute distances of amplicons to the telomere (kb). Amplicon name indicates the 7q21 genes.
