# Supplementary material for: Small Deletion at the 7q21.2 Locus in a CCM Family Detected by Real-Time Quantitative PCR
Source: Hindawi journal article supplement (doi:10.1155/2010/854737), 2010-01-01
Supplement: f4 [file 854737.f4.pdf]

**Supplementary Table 3.** RT-QPCR primers sequences for *ANKIB1* breakpoint region analysis.

| Primer      | Forward primer             | Reverse primer                |
|-------------|----------------------------|-------------------------------|
| ANKIB1_Ex1  | catttggtgctccgagttca       | acaggcgacagacacactccta        |
| ANKIB1_Ex2  | attagaatgtgaaagatgttcagaag | ttctgataggcagtggcactttt       |
| ANKIB1_Ex3  | tgatatctgaaggagcccttcac    | caatctgctcttctgaaatcatctct    |
| ANKIB1_Ex4  | cctcaatctggaatctcaaattgg   | tgacctctcggttgctaatgca        |
| ANKIB1_Ex5  | aaggcctcaggatcttcgtaga     | agagaggagcctgaagcatgtc        |
| ANKIB1_Ex6  | actccaaggactacacgctcttct   | tggtgtctaaatcccaggagat        |
| ANKIB1_Ex7  | agtgtctgggattacaggtgtga    | gggagagaaccctgctataaaactaa    |
| ANKIB1_Ex8  | cagaagaccgaggtgagaggat     | gcagtggcacgatcacagat          |
| ANKIB1_Ex9  | tctgatacactcagcttcccattg   | ccagcagaagaggtgtcctttt        |
| ANKIB1_Ex10 | tgcttggtgaagcacatga        | tcggttatTTTTgcagccaat         |
| ANKIB1_Ex11 | caggaggatcacttgaggccagg    | tggcacaaggcttgagtttag         |
| ANKIB1_Ex13 | ggctgagaaaaaacacaaacgat    | tgatactatgctcatggTTTTaaatcttg |
