# Supplementary material for: Small Deletion at the 7q21.2 Locus in a CCM Family Detected by Real-Time Quantitative PCR
Source: Hindawi journal article supplement (doi:10.1155/2010/854737), 2010-01-01
Supplement: f5 [file 854737.f5.pdf]

**Supplementary Table 4.** RT-QPCR primers sequences and positions used for expression analysis of 7q21 genes region.

| Primer      | Forward primer               | Reverse primer           | Distance<br>to p-tel. (bp) |
|-------------|------------------------------|--------------------------|----------------------------|
| PFTK1_exp   | ggcagatttcggtcttgca          | caaggtaaccacttcgttgagta  | 90,384,945                 |
| FZD1_exp    | tgctggccggctttgt             | gtgccatcgcttcatgat       | 90,733,648                 |
| MTERF_exp   | aggcggagtaaaagcgaact         | cctccagaaaggctggagaa     | 91,347,930                 |
| AKAP9_exp   | catagtggagaaataaccagtcagag   | cagtcacatcgctgtggtgaaatt | 91,441,174                 |
| CYP51A1_exp | tgtctacagtcgcctgacaacac      | ccaagaaaactggattaggcacat | 91,596,171                 |
| KRIT1_CD3   | tcagtacaagtgaagggtgcagtaaaga | ggaatttcccagcaattctgtaag | 91,680,620                 |
| KRIT1_CD4   | tgcccactgaaagaaattcatg       | ttcacggaaaaaaaactctgcat  | 91,667,987                 |
| ANKIB1_exp  | catctccaagaactccaaggactac    | tccccaggagataagctgatttc  | 91,810,394                 |
| GATAD1_exp  | ggcaagcagagtaagcaggaa        | ccggagcagatttgatttagtggt | 91,915,198                 |
| ERVWE1_exp  | aatctgcaactttccccaaaaa       | tggttatgaagggccttcca     | 91,938,087                 |
| PEX1_exp    | tttattagagcacaggctgcaaag     | ccgaggagcaatggattcaa     | 91,963,951                 |
| CDK6_exp    | ctggaaagggtgcaaagaaaacc      | attcagctccgaggtgttctg    | 92,082,443                 |

*Note:* Primer sequences and absolute distances of from the telomere (kb).
