# Supplementary figures and images for: Small Deletion at the 7q21.2 Locus in a CCM Family Detected by Real-Time Quantitative PCR
Source: Hindawi journal article supplement (doi:10.1155/2010/854737), 2010-01-01

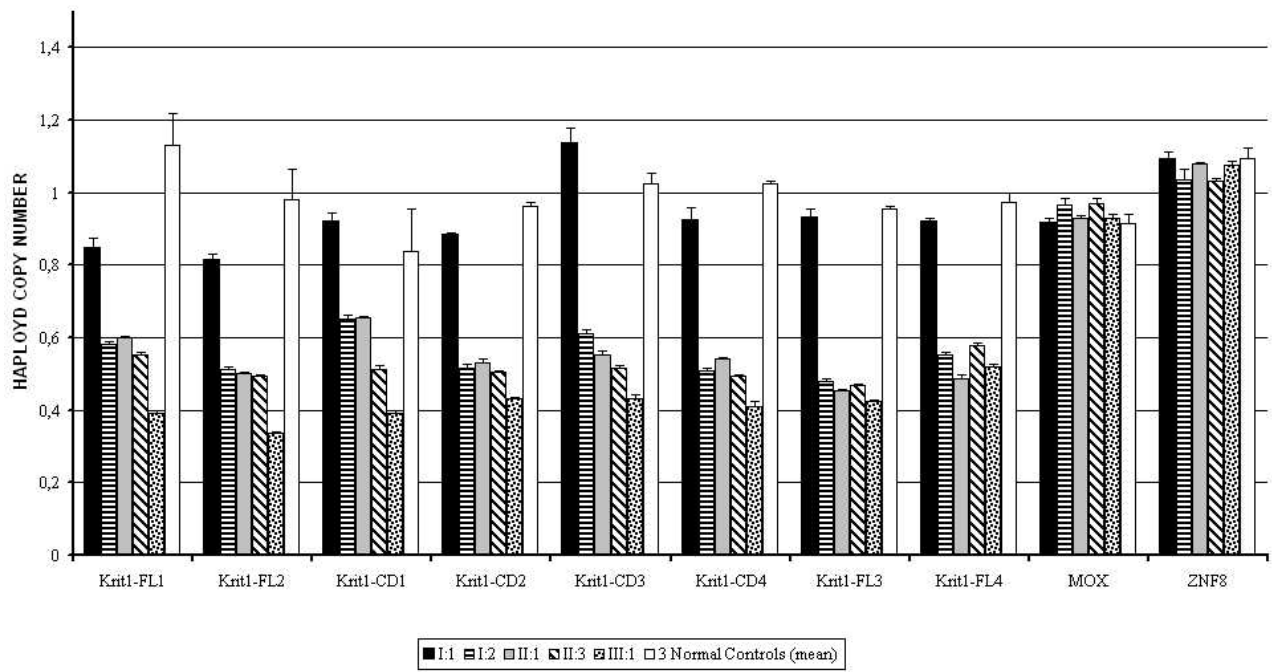

Supplement: f1 [file 854737.f1.pdf]
